# Supplementary material
Source: PubMed Central journal article supplement (PMC4149597)
Supplement: NIHMS578206-supplement-Supp_Figure_S1-S2.pdf [file NIHMS578206-supplement-Supp_Figure_S1-S2.pdf]

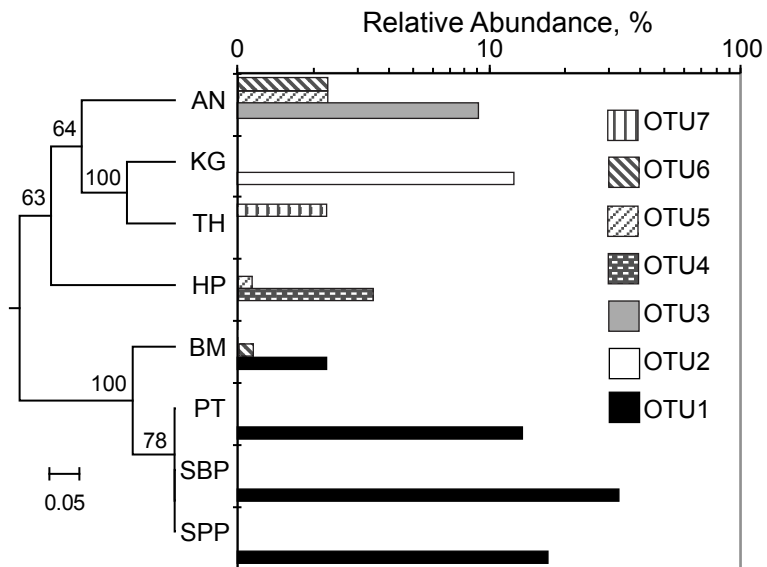

Figure S1. Distribution and relationship between Chloroflexi OTUs from oral and contiguous sites (AN, anterior nares; KG, keratinized gingiva; TH, throat; BM, bucal mucosa; PT, palatine tonsils; SBP, subgingival plaques; SPP, supragingival plaque).

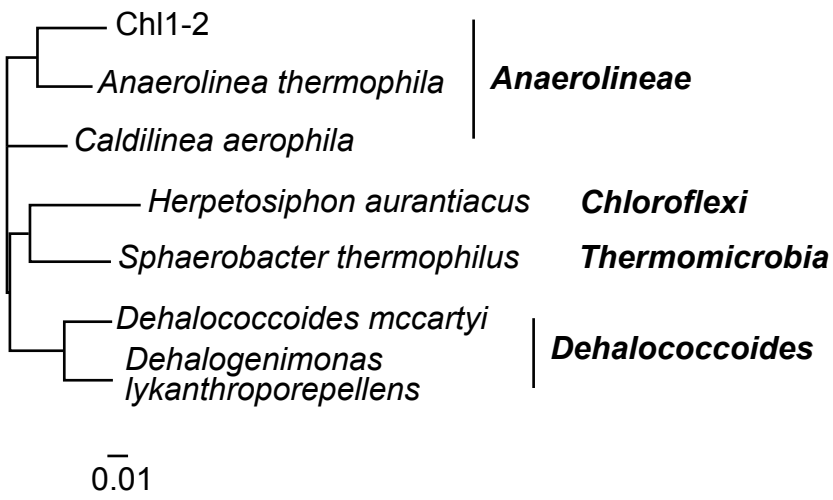

Figure S2. Hierarchical clustering of representative *Chloroflexi* genomes based on COG composition.
